# Supplementary material
Source: MDPI journal article supplement (https://www.mdpi.com/2072-4292/12/11/1769)
Supplement: s1 [file s1]

## Sheet: Tabelle1
LCZ	1	2	3	4	5	6	7	8	9	10	A	B	C	D	E	F	G
1	1	0.916667	0.833333	0.666667	0.583333	0.5	0.583333	0.75	0.416667	0.75	0.333333	0.25	0.0833333	0	0.25	0	0
2	0.916667	1	0.916667	0.583333	0.666667	0.583333	0.666667	0.833333	0.416667	0.833333	0.416667	0.333333	0.25	0.0833333	0.333333	0.0833333	0.0833333
3	0.833333	0.916667	1	0.5	0.583333	0.666667	0.75	0.916667	0.583333	0.916667	0.5	0.416667	0.333333	0.166667	0.416667	0.166667	0.166667
4	0.666667	0.583333	0.5	1	0.916667	0.833333	0.75	0.5	0.75	0.583333	0.5	0.583333	0.5	0.333333	0.0833333	0.333333	0.333333
5	0.583333	0.666667	0.583333	0.916667	1	0.916667	0.833333	0.666667	0.833333	0.666667	0.583333	0.666667	0.5	0.416667	0.166667	0.416667	0.416667
6	0.5	0.583333	0.666667	0.833333	0.916667	1	0.916667	0.75	0.916667	0.75	0.666667	0.75	0.666667	0.583333	0.25	0.5	0.5
7	0.583333	0.666667	0.75	0.75	0.833333	0.916667	1	0.666667	0.833333	0.666667	0.75	0.666667	0.583333	0.416667	0.166667	0.416667	0.416667
8	0.75	0.833333	0.916667	0.5	0.666667	0.75	0.666667	1	0.75	0.916667	0.416667	0.5	0.416667	0.25	0.5	0.333333	0.333333
9	0.416667	0.416667	0.583333	0.75	0.833333	0.916667	0.833333	0.75	1	0.666667	0.583333	0.666667	0.75	0.583333	0.333333	0.583333	0.583333
10	0.75	0.833333	0.916667	0.583333	0.666667	0.75	0.666667	0.916667	0.666667	1	0.416667	0.5	0.416667	0.25	0.5	0.333333	0.333333
A	0.333333	0.416667	0.5	0.5	0.583333	0.666667	0.75	0.416667	0.583333	0.416667	1	0.916667	0.833333	0.666667	0.416667	0.666667	0.666667
B	0.25	0.333333	0.416667	0.583333	0.666667	0.75	0.666667	0.5	0.666667	0.5	0.916667	1	0.916667	0.75	0.5	0.75	0.75
C	0.0833333	0.25	0.333333	0.5	0.5	0.666667	0.583333	0.416667	0.75	0.416667	0.833333	0.916667	1	0.833333	0.583333	0.833333	0.833333
D	0	0.0833333	0.166667	0.333333	0.416667	0.583333	0.416667	0.25	0.583333	0.25	0.666667	0.75	0.833333	1	0.75	0.916667	0.916667
E	0.25	0.333333	0.416667	0.0833333	0.166667	0.25	0.166667	0.5	0.333333	0.5	0.416667	0.5	0.583333	0.75	1	0.75	0.75
F	0	0.0833333	0.166667	0.333333	0.416667	0.5	0.416667	0.333333	0.583333	0.333333	0.666667	0.75	0.833333	0.916667	0.75	1	0.916667
G	0	0.0833333	0.166667	0.333333	0.416667	0.5	0.416667	0.333333	0.583333	0.333333	0.666667	0.75	0.833333	0.916667	0.75	0.916667	1
